# Supplementary material for: Elucidating the role of acetylene in ortho-phthalimide functional benzoxazines: design, synthesis, and structure–property investigations
Source: Royal Society of Chemistry journal article supplement (doi:10.1039/d1py00850a), 2021-01-01
Supplement: d1py00850a1.pdf [file d1py00850a1.pdf]

## *Supporting Information*

### **Elucidating the Role of Acetylene in *Ortho*-Phthalimide Functional Benzoxazines: Design, Synthesis, and Structure–Property Investigations**

Yin Lu,<sup>1</sup> Xinye Yu,<sup>1</sup> Corey J. Evans,<sup>2</sup> and Shengfu Yang,<sup>\*,2</sup> and Kan Zhang,<sup>\*,1</sup>

<sup>1</sup>Research School of Polymeric Materials, School of Materials Science and Engineering, Jiangsu University, Zhenjiang 212013, China.

<sup>2</sup>Department of Chemistry, University of Leicester, Leicester LE1 7RH, United Kingdom.

\*: Corresponding authors

E-mails: sfy1@le.ac.uk (S.Y.); zhangkan@ujs.edu.cn (K.Z.).

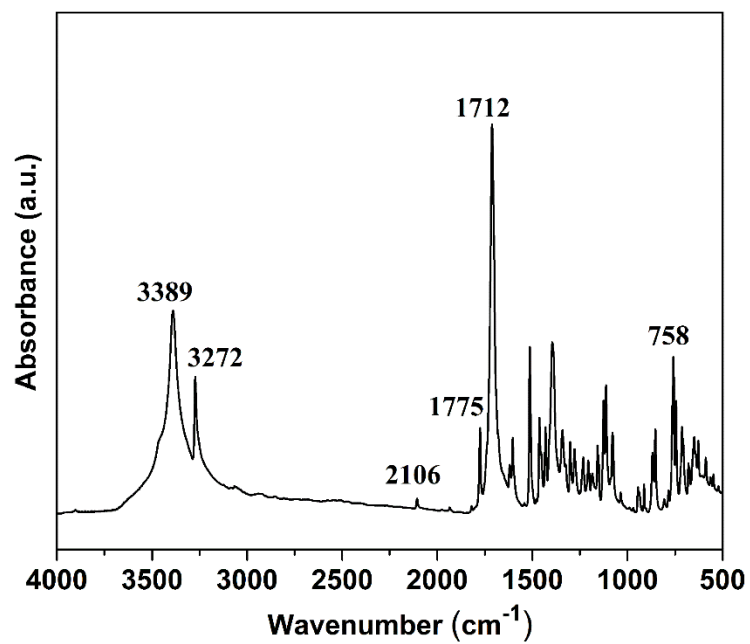

**Figure S1.** FTIR spectrum of *oPPac*.

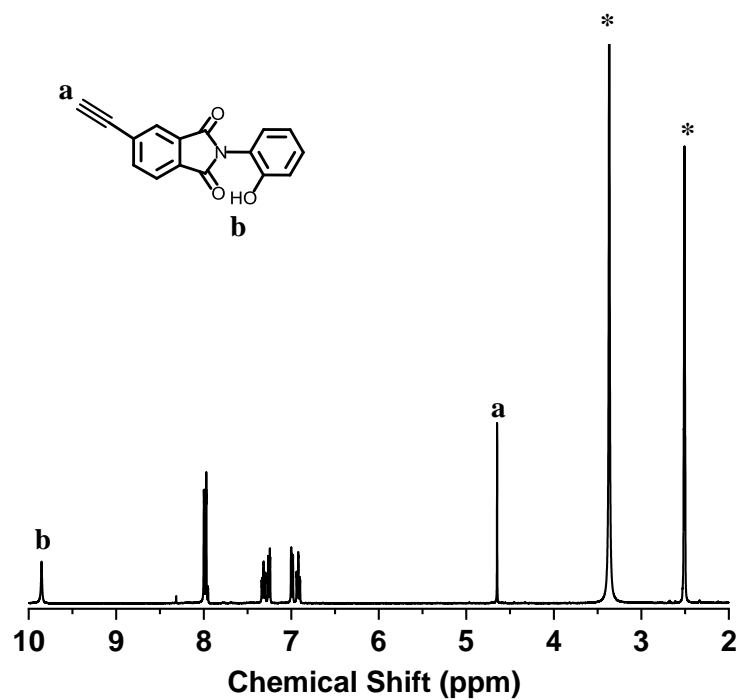

**Figure S2.** <sup>1</sup>H NMR spectrum of *oPPac* (DMSO-d<sub>6</sub>, 20°C).

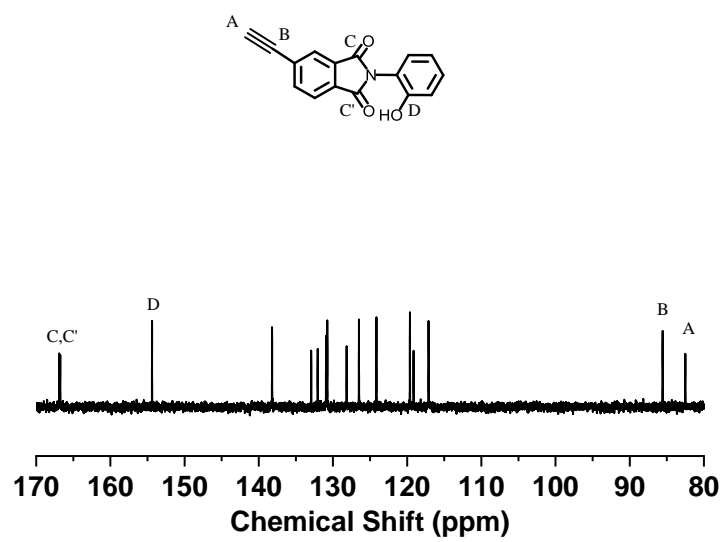

**Figure S3.** <sup>13</sup>C NMR spectrum of *o*PPac (DMSO-d<sub>6</sub>, 20°C).

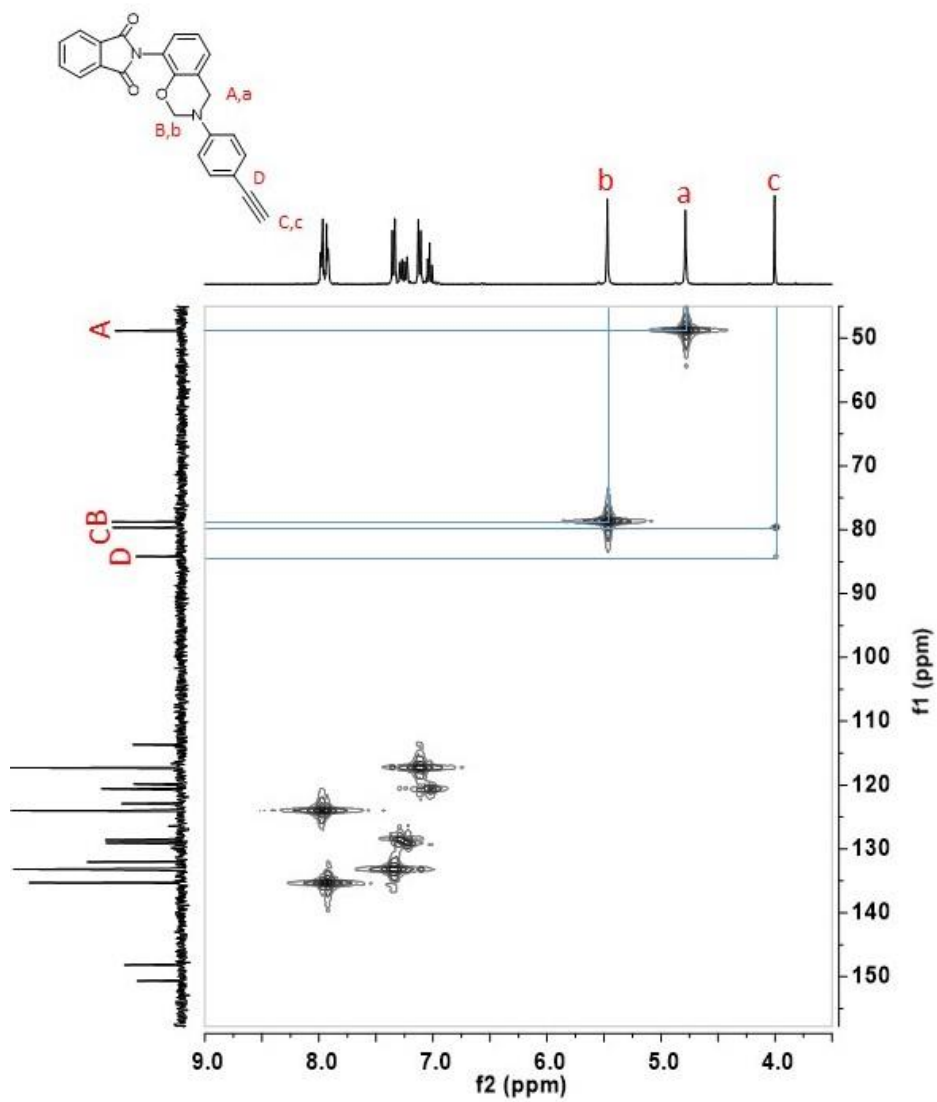

Figure S4. 2D  $^1\text{H}$ - $^{13}\text{C}$  HMQC NMR spectrum of *o*PP-ac.

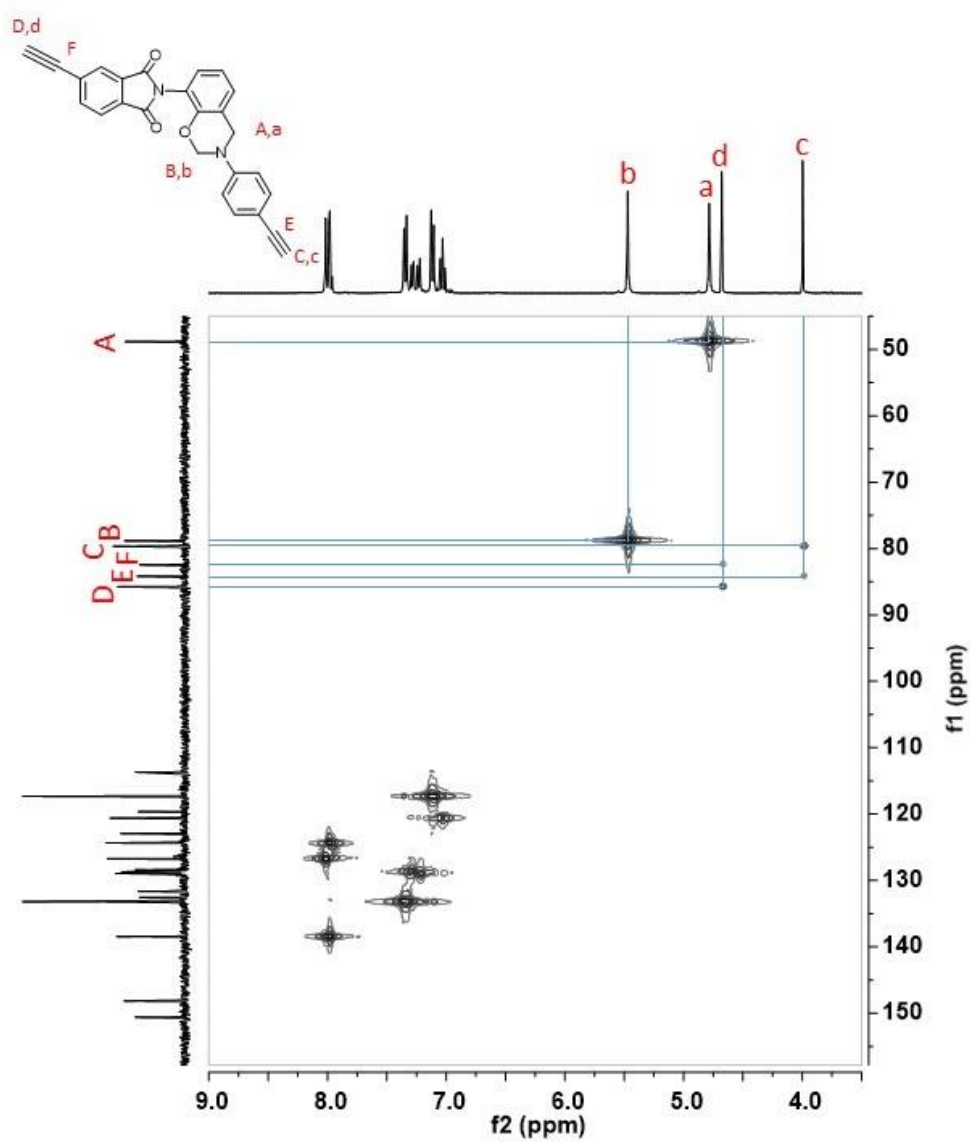

Figure S5. 2D  $^1\text{H}$ - $^{13}\text{C}$  HMQC NMR spectrum of *oPPac-ac*.

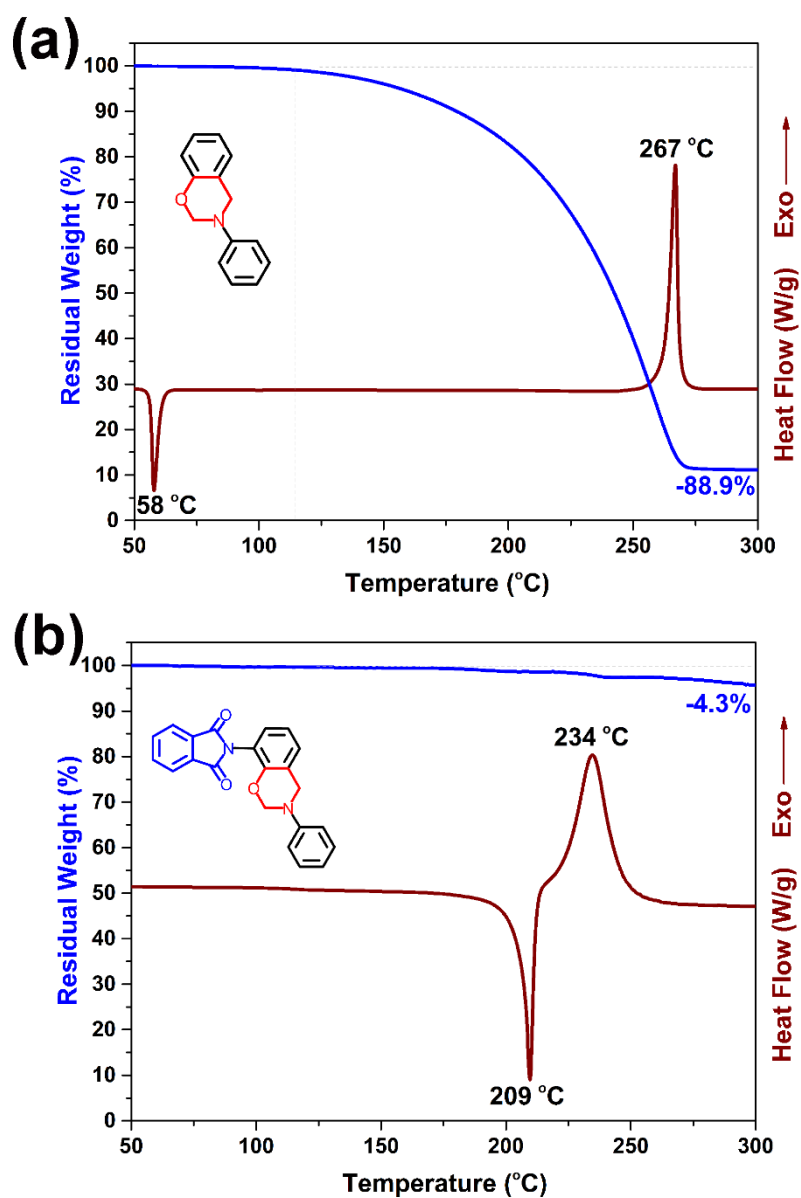

**Figure S6.** TGA vs DSC plots of benzoxazine monomers (heating rate: 10 °C/min, under a N<sub>2</sub> atmosphere): (a) PH-a and (b) oPP-a.

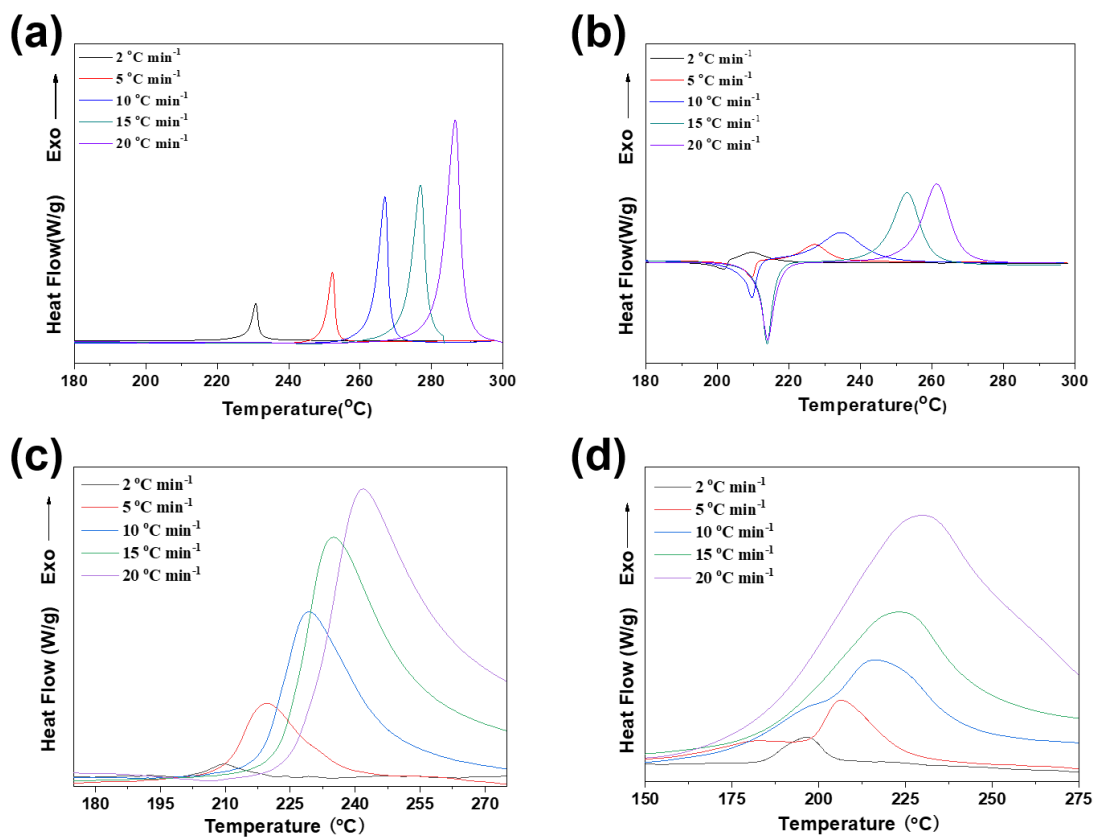

**Figure S7.** DSC thermograms of PH-a (a), *o*PP-a (b), *o*PP-ac (c) and *o*PPac-ac (d) at different heating rates.

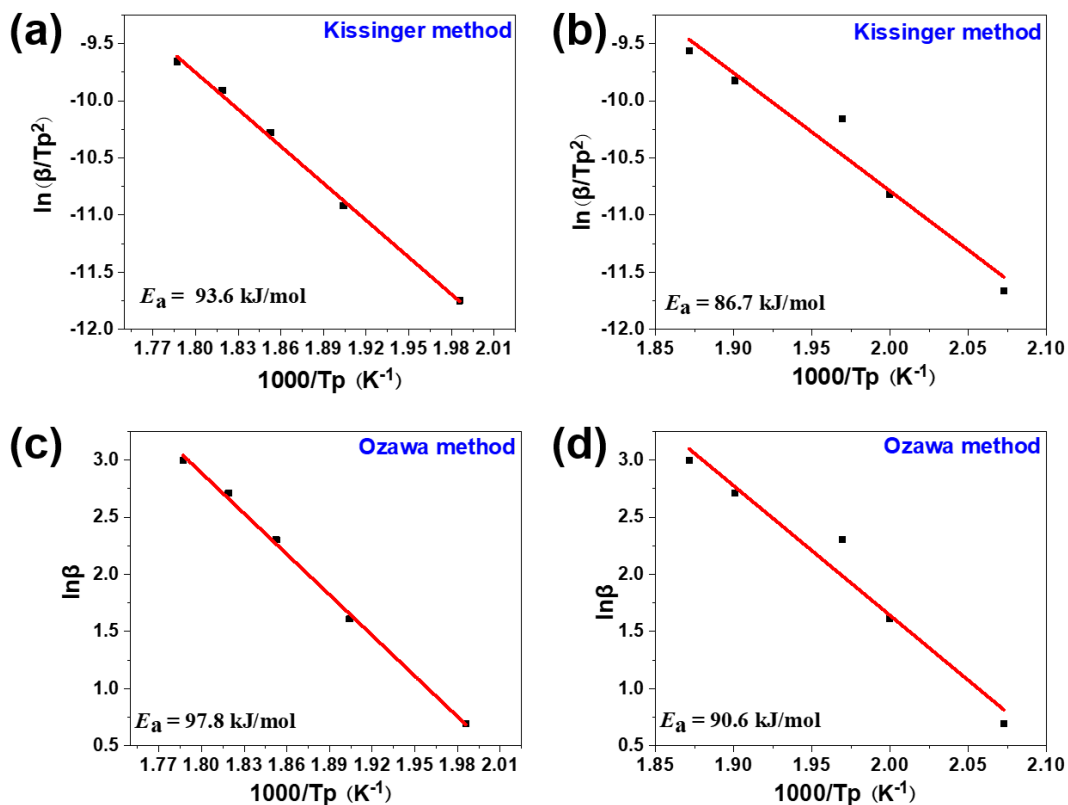

**Figure S8.** Representations of the Kissinger method for the calculation of activation energy for PH-a (a) and *o*PP-a (b), and representations of the Ozawa method for PH-a (c) and *o*PP-a (d).

**Table S1.** The thermal properties of benzoxazines obtained in this work comparing with other imide-containing benzoxazine and difunctional benzoxazines.



| Sample         | Monomer Structure                                                                   | T <sub>g</sub> (DSC)<br>(°C) | T <sub>g</sub> (DMA)<br>(°C) | T <sub>d5</sub><br>(°C) | T <sub>d10</sub><br>(°C) | Y <sub>c</sub><br>(%) | LOI*<br>(%) | Reference |
|----------------|-------------------------------------------------------------------------------------|------------------------------|------------------------------|-------------------------|--------------------------|-----------------------|-------------|-----------|
| poly(PH-a)     | 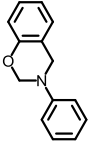   | /                            | 133                          | 292                     | 351                      | 38                    | 32.7        |           |
| poly(oPP-a)    |    | /                            | 194                          | 307                     | 336                      | 56                    | 39.9        |           |
| poly(oPP-ac)   |    | /                            | 231                          | 341                     | 396                      | 55                    | 39.5        | this work |
| poly(oPPac-ac) |   | /                            | 297                          | 404                     | 474                      | 65                    | 43.5        |           |
| poly(oHTI-a)   |  | /                            | 241                          | 305                     | 346                      | 47                    | 36.3        | S1        |
| poly(pHTI-a)   |  | /                            | 215                          | 334                     | 377                      | 28                    | 28.7        |           |
| poly(oPP-ddm)  |  | 201                          | /                            | 303                     | 354                      | 58                    | 40.7        | S2        |
| poly(pPP-a)    |  | 162                          | /                            | 289                     | 318                      | 39                    | 33.1        |           |

|                               |  |     |     |     |     |    |      |    |
|-------------------------------|--|-----|-----|-----|-----|----|------|----|
| poly( <i>p</i> PP-ddm)        |  | 204 | /   | 343 | 384 | 53 | 38.7 |    |
| poly( <i>o</i> HTI-a)         |  | 233 | /   | 342 | 382 | 48 | 36.7 |    |
| poly( <i>o</i> HHI-a)         |  | 180 | /   | 340 | 375 | 28 | 28.7 | S3 |
| poly( <i>o</i> MHI-a)         |  | 173 | /   | 327 | 367 | 26 | 27.9 |    |
| poly(4,4'-BF-a)               |  | /   | 161 | 263 | 341 | 53 | 38.7 |    |
| poly(2,4'-BF-a)               |  | /   | 180 | 294 | 349 | 51 | 37.9 | S4 |
| poly(2,2'-BF-a)               |  | /   | 218 | 353 | 403 | 61 | 41.9 |    |
| poly( <i>o</i> -hydroxyamide) |  | /   | 212 | 250 | 280 | 53 | 38.7 |    |
| poly( <i>p</i> -hydroxyamide) |  | /   | /   | 280 | 320 | 50 | 37.5 |    |

/: not reported

\*: LOI value was calculated by Krevelen equation.

Atomic Coordinates of the Atoms in Calculated Equilibrium Structures.

PH-a

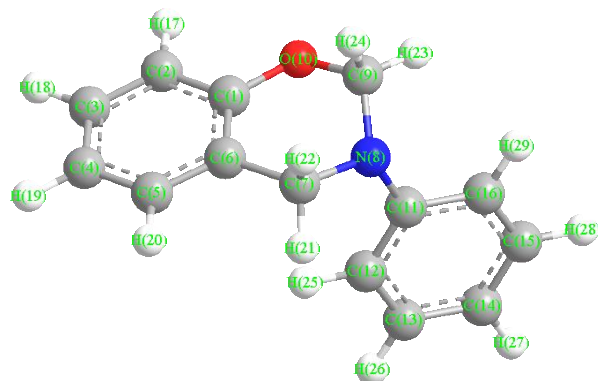

|       |         |         |         |
|-------|---------|---------|---------|
| C(1)  | -1.7298 | 0.6036  | -0.5147 |
| C(2)  | -2.7692 | 0.2971  | -1.4015 |
| C(3)  | -3.7186 | -0.6606 | -1.0505 |
| C(4)  | -3.6369 | -1.3189 | 0.1828  |
| C(5)  | -2.5902 | -1.0136 | 1.0538  |
| C(6)  | -1.6223 | -0.0581 | 0.7215  |
| C(7)  | -0.4685 | 0.2891  | 1.6453  |
| N(8)  | 0.6144  | 0.9787  | 0.9342  |
| C(9)  | 0.0673  | 2.0283  | 0.1213  |
| O(10) | -0.8192 | 1.5476  | -0.9173 |
| C(11) | 1.6784  | 0.2086  | 0.3749  |
| C(12) | 1.5869  | -1.1742 | 0.1513  |
| C(13) | 2.6798  | -1.8825 | -0.3585 |
| C(14) | 3.8708  | -1.2271 | -0.6734 |
| C(15) | 3.9639  | 0.1528  | -0.4607 |
| C(16) | 2.8861  | 0.8608  | 0.0677  |
| H(17) | -2.8144 | 0.8195  | -2.3526 |
| H(18) | -4.5255 | -0.8929 | -1.7409 |
| H(19) | -4.3762 | -2.0660 | 0.4579  |
| H(20) | -2.5129 | -1.5313 | 2.0091  |
| H(21) | -0.0666 | -0.6018 | 2.1351  |
| H(22) | -0.8116 | 0.9571  | 2.4492  |
| H(23) | 0.8463  | 2.5720  | -0.4096 |
| H(24) | -0.5047 | 2.7129  | 0.7605  |
| H(25) | 0.6597  | -1.7019 | 0.3496  |
| H(26) | 2.5861  | -2.9530 | -0.5243 |
| H(27) | 4.7151  | -1.7805 | -1.0751 |
| H(28) | 4.8882  | 0.6788  | -0.6873 |

|              |               |               |               |
|--------------|---------------|---------------|---------------|
| <b>H(29)</b> | <b>2.9836</b> | <b>1.9239</b> | <b>0.2716</b> |
|--------------|---------------|---------------|---------------|

**Total Energy = -671.303245 au**

***o*PP-a**

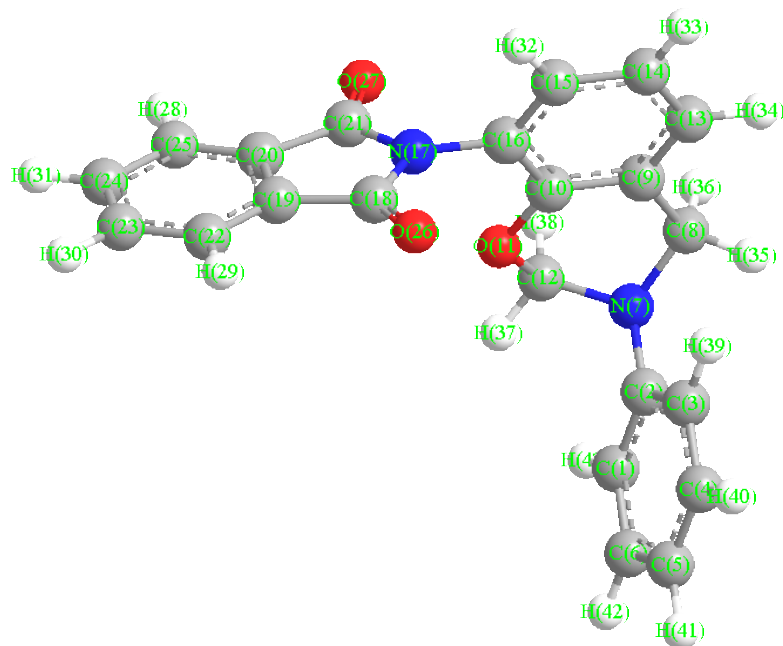

|              |               |                |                |
|--------------|---------------|----------------|----------------|
| <b>C(1)</b>  | <b>3.8371</b> | <b>-2.0787</b> | <b>-0.9873</b> |
| <b>C(2)</b>  | <b>3.4855</b> | <b>-0.8208</b> | <b>-0.4675</b> |
| <b>C(3)</b>  | <b>3.7272</b> | <b>-0.5615</b> | <b>0.8900</b>  |
| <b>C(4)</b>  | <b>4.3130</b> | <b>-1.5376</b> | <b>1.7024</b>  |
| <b>C(5)</b>  | <b>4.6477</b> | <b>-2.7892</b> | <b>1.1838</b>  |
| <b>C(6)</b>  | <b>4.4006</b> | <b>-3.0551</b> | <b>-0.1674</b> |
| <b>N(7)</b>  | <b>2.9253</b> | <b>0.1466</b>  | <b>-1.3585</b> |
| <b>C(8)</b>  | <b>2.9850</b> | <b>1.5668</b>  | <b>-0.9946</b> |
| <b>C(9)</b>  | <b>1.7434</b> | <b>2.0201</b>  | <b>-0.2462</b> |
| <b>C(10)</b> | <b>0.5846</b> | <b>1.2271</b>  | <b>-0.3172</b> |
| <b>O(11)</b> | <b>0.5458</b> | <b>0.0480</b>  | <b>-1.0003</b> |

|       |         |         |         |
|-------|---------|---------|---------|
| C(12) | 1.6450  | -0.1575 | -1.9275 |
| C(13) | 1.7098  | 3.1978  | 0.5066  |
| C(14) | 0.5563  | 3.5908  | 1.1870  |
| C(15) | -0.5921 | 2.8004  | 1.1080  |
| C(16) | -0.5824 | 1.6260  | 0.3583  |
| N(17) | -1.7480 | 0.8115  | 0.2661  |
| C(18) | -2.2367 | 0.0020  | 1.3175  |
| C(19) | -3.3974 | -0.7417 | 0.7452  |
| C(20) | -3.5438 | -0.3718 | -0.5931 |
| C(21) | -2.4865 | 0.6277  | -0.9258 |
| C(22) | -4.2507 | -1.6601 | 1.3430  |
| C(23) | -5.2690 | -2.2066 | 0.5490  |
| C(24) | -5.4172 | -1.8339 | -0.7951 |
| C(25) | -4.5511 | -0.9038 | -1.3876 |
| O(26) | -1.7850 | -0.0456 | 2.4433  |
| O(27) | -2.2846 | 1.1975  | -1.9783 |
| H(28) | -4.6577 | -0.6079 | -2.4270 |
| H(29) | -4.1277 | -1.9410 | 2.3849  |
| H(30) | -5.9556 | -2.9301 | 0.9804  |
| H(31) | -6.2165 | -2.2741 | -1.3853 |
| H(32) | -1.5030 | 3.0867  | 1.6250  |
| H(33) | 0.5497  | 4.5045  | 1.7738  |
| H(34) | 2.6080  | 3.8103  | 0.5671  |
| H(35) | 3.8902  | 1.7491  | -0.4096 |
| H(36) | 3.0932  | 2.1424  | -1.9257 |
| H(37) | 1.5703  | -1.2052 | -2.2118 |
| H(38) | 1.4675  | 0.4888  | -2.7951 |

|       |        |         |         |
|-------|--------|---------|---------|
| H(39) | 3.4386 | 0.3889  | 1.3274  |
| H(40) | 4.4889 | -1.3172 | 2.7524  |
| H(41) | 5.0966 | -3.5467 | 1.8204  |
| H(42) | 4.6672 | -4.0201 | -0.5915 |
| H(43) | 3.6889 | -2.2765 | -2.0459 |

Total Energy = -1183.212877 au

***o*PP-ac**

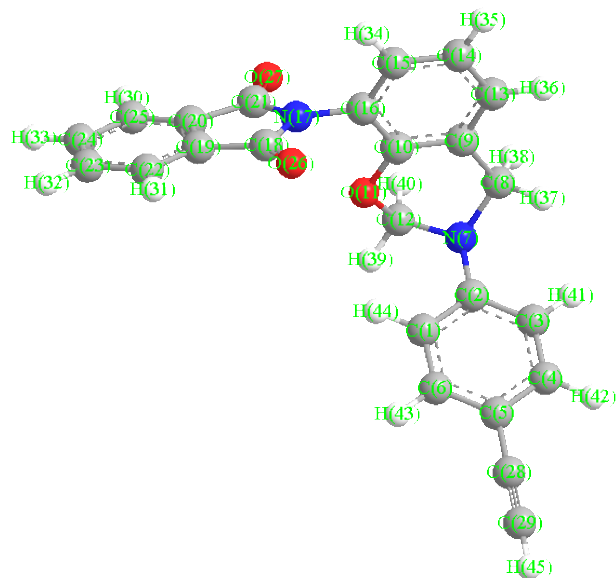

|      |         |         |         |
|------|---------|---------|---------|
| C(1) | -2.7367 | 1.1392  | -0.5804 |
| C(2) | -3.1584 | -0.1751 | -0.8492 |
| C(3) | -4.5031 | -0.5084 | -0.5965 |
| C(4) | -5.3910 | 0.4329  | -0.0912 |
| C(5) | -4.9749 | 1.7547  | 0.1664  |
| C(6) | -3.6334 | 2.0875  | -0.0925 |
| N(7) | -2.2978 | -1.1538 | -1.4078 |
| C(8) | -2.1595 | -2.4532 | -0.7308 |

|       |         |         |         |
|-------|---------|---------|---------|
| C(9)  | -0.8942 | -2.4982 | 0.1136  |
| C(10) | 0.1103  | -1.5358 | -0.0848 |
| O(11) | -0.0086 | -0.5308 | -1.0026 |
| C(12) | -1.0527 | -0.7543 | -1.9819 |
| C(13) | -0.7044 | -3.4736 | 1.0980  |
| C(14) | 0.4515  | -3.5024 | 1.8784  |
| C(15) | 1.4474  | -2.5460 | 1.6699  |
| C(16) | 1.2818  | -1.5684 | 0.6917  |
| N(17) | 2.2932  | -0.5917 | 0.4588  |
| C(18) | 2.5501  | 0.5072  | 1.3110  |
| C(19) | 3.6131  | 1.3032  | 0.6297  |
| C(20) | 3.9279  | 0.6787  | -0.5789 |
| C(21) | 3.0831  | -0.5441 | -0.7134 |
| C(22) | 4.2488  | 2.4708  | 1.0318  |
| C(23) | 5.2225  | 3.0033  | 0.1748  |
| C(24) | 5.5399  | 2.3754  | -1.0386 |
| C(25) | 4.8930  | 1.1957  | -1.4336 |
| O(26) | 2.0028  | 0.7224  | 2.3730  |
| O(27) | 3.0618  | -1.3578 | -1.6138 |
| C(28) | -5.8903 | 2.7266  | 0.6763  |
| C(29) | -6.6684 | 3.5502  | 1.1088  |
| H(30) | 5.1320  | 0.7013  | -2.3706 |
| H(31) | 3.9964  | 2.9482  | 1.9741  |
| H(32) | 5.7410  | 3.9166  | 0.4540  |
| H(33) | 6.2996  | 2.8115  | -1.6817 |
| H(34) | 2.3583  | -2.5503 | 2.2607  |
| H(35) | 0.5774  | -4.2624 | 2.6437  |

|       |         |         |         |
|-------|---------|---------|---------|
| H(36) | -1.4838 | -4.2160 | 1.2607  |
| H(37) | -3.0347 | -2.6250 | -0.1010 |
| H(38) | -2.1445 | -3.2504 | -1.4882 |
| H(39) | -1.1477 | 0.1848  | -2.5249 |
| H(40) | -0.7019 | -1.5442 | -2.6570 |
| H(41) | -4.8615 | -1.5075 | -0.8287 |
| H(42) | -6.4254 | 0.1561  | 0.0903  |
| H(43) | -3.2864 | 3.0957  | 0.1142  |
| H(44) | -1.6982 | 1.4195  | -0.7191 |
| H(45) | -7.3515 | 4.2755  | 1.4910  |

Total Energy = -1259.362995 au

### *o*PPac-ac

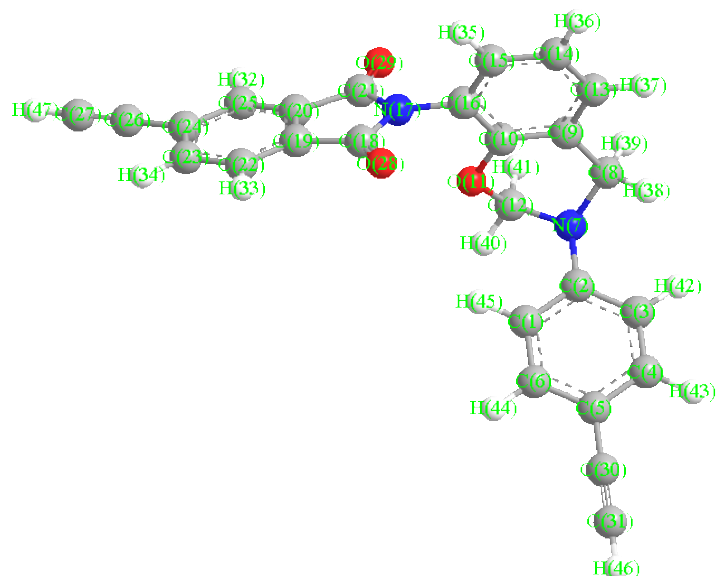

|      |         |        |         |
|------|---------|--------|---------|
| C(1) | -2.9620 | 1.4000 | -0.5013 |
| C(2) | -3.5197 | 0.1927 | -0.9582 |



|       |         |         |         |
|-------|---------|---------|---------|
| C(3)  | -4.9098 | 0.0092  | -0.8274 |
| C(4)  | -5.7110 | 0.9911  | -0.2583 |
| C(5)  | -5.1569 | 2.2078  | 0.1882  |
| C(6)  | -3.7697 | 2.3921  | 0.0507  |
| N(7)  | -2.7463 | -0.8162 | -1.5864 |
| C(8)  | -2.8183 | -2.1941 | -1.0743 |
| C(9)  | -1.6341 | -2.5040 | -0.1699 |
| C(10) | -0.5076 | -1.6641 | -0.1852 |
| O(11) | -0.4342 | -0.5504 | -0.9727 |
| C(12) | -1.4231 | -0.5171 | -2.0318 |
| C(13) | -1.6383 | -3.6058 | 0.6916  |
| C(14) | -0.5556 | -3.8778 | 1.5284  |
| C(15) | 0.5625  | -3.0417 | 1.5020  |
| C(16) | 0.5901  | -1.9419 | 0.6479  |
| N(17) | 1.7280  | -1.0845 | 0.6000  |
| C(18) | 2.0556  | -0.1404 | 1.6013  |
| C(19) | 3.2529  | 0.5866  | 1.0893  |
| C(20) | 3.5754  | 0.0790  | -0.1709 |
| C(21) | 2.5987  | -0.9992 | -0.5101 |
| C(22) | 3.9990  | 1.6047  | 1.6700  |
| C(23) | 5.0859  | 2.1066  | 0.9485  |
| C(24) | 5.4208  | 1.5978  | -0.3277 |
| C(25) | 4.6497  | 0.5605  | -0.8998 |
| C(26) | 6.5400  | 2.1336  | -1.0379 |
| C(27) | 7.4882  | 2.5875  | -1.6401 |
| O(28) | 1.4649  | 0.0137  | 2.6504  |
| O(29) | 2.5441  | -1.6865 | -1.5083 |

|              |                |                |                |
|--------------|----------------|----------------|----------------|
| <b>C(30)</b> | <b>-5.9818</b> | <b>3.2228</b>  | <b>0.7643</b>  |
| <b>C(31)</b> | <b>-6.6833</b> | <b>4.0830</b>  | <b>1.2530</b>  |
| <b>H(32)</b> | <b>4.8951</b>  | <b>0.1594</b>  | <b>-1.8779</b> |
| <b>H(33)</b> | <b>3.7441</b>  | <b>1.9960</b>  | <b>2.6503</b>  |
| <b>H(34)</b> | <b>5.6937</b>  | <b>2.9032</b>  | <b>1.3663</b>  |
| <b>H(35)</b> | <b>1.4197</b>  | <b>-3.2351</b> | <b>2.1396</b>  |
| <b>H(36)</b> | <b>-0.5807</b> | <b>-4.7332</b> | <b>2.1967</b>  |
| <b>H(37)</b> | <b>-2.5124</b> | <b>-4.2543</b> | <b>0.7126</b>  |
| <b>H(38)</b> | <b>-3.7521</b> | <b>-2.3244</b> | <b>-0.5238</b> |
| <b>H(39)</b> | <b>-2.8444</b> | <b>-2.8902</b> | <b>-1.9251</b> |
| <b>H(40)</b> | <b>-1.3619</b> | <b>0.4844</b>  | <b>-2.4549</b> |
| <b>H(41)</b> | <b>-1.1223</b> | <b>-1.2598</b> | <b>-2.7805</b> |
| <b>H(42)</b> | <b>-5.3694</b> | <b>-0.9001</b> | <b>-1.2047</b> |
| <b>H(43)</b> | <b>-6.7818</b> | <b>0.8313</b>  | <b>-0.1729</b> |
| <b>H(44)</b> | <b>-3.3186</b> | <b>3.3152</b>  | <b>0.4028</b>  |
| <b>H(45)</b> | <b>-1.8898</b> | <b>1.5582</b>  | <b>-0.5441</b> |
| <b>H(46)</b> | <b>-7.2989</b> | <b>4.8403</b>  | <b>1.6844</b>  |
| <b>H(47)</b> | <b>8.3236</b>  | <b>2.9862</b>  | <b>-2.1723</b> |

**Total Energy = -1335.510271 au**

## Reference

- S1. X. Yu, Z. Shang and K. Zhang, *Thermochimica Acta*, 2019, **675**, 29-37.
- S2. K. Zhang, J. Liu, S. Ohashi, X. Liu, Z. Han and H. Ishida, *J. Polym. Sci., Part A: Polym. Chem.*, 2015, **53**, 1330-1338.
- S3. K. Zhang, Y. Liu, Z. Shang, C. J. Evans and S. Yang, *Polymers*, 2019, **11**, 399.
- S4. J. Liu and H. Ishida, *Macromolecules*, 2014, **47**, 5682-5690.
- S5. T. Agag, J. Liu, R. Graf, H. W. Spiess and H. Ishida, *Macromolecules*, 2012, **45**, 8991-8997.
